# Supplementary material for: gjSOX9 Cloning, Expression, and Comparison with gjSOXs Family Members in Gekko japonicus
Source: MDPI journal article supplement (doi:10.3390/cimb45110584), 2023-11-20
Supplement: s1 [file s1]

Table S1 gjSOX9 and its orthologs properties.

Table S2 gjSOX family members and their respective orthologs in this study.

Figure S1 Sequence alignment of gjSOX9

Figure S2 Hydrophilic analysis (left) and signal peptide prediction (right) of gjSOX9.

Figure S3 Phylogenetic analyses of gjSOX9 with its homologies.

Figure S4 Sequence conservation analyses of motif1-8 among 16 gjSOX members.

Figure S5 Multiple sequence alignment of HMGs for 16 gjSOX members.

**Table S1** gjSOX9 and its orthologs properties. HI for hydrophilicity index; SL for subcellular localization. gjSOX9 sequence was cloned in this study while other SOX9 homologs sequences were retrieved from NCBI database.

| Name    | Accession      | Species                          | Size | MW(kDa) | pI   | HI*    | SL*     |
|---------|----------------|----------------------------------|------|---------|------|--------|---------|
| gjSOX9  | WGV33816.1     | <i>Gekko japonicus</i>           | 494  | 55.35   | 6.31 | -1.090 | Nucleus |
| stSOX9  | XP_048345639.1 | <i>Sphacrodactylus townsendi</i> | 495  | 55.04   | 6.20 | -1.033 | Nucleus |
| emSOX9  | XP_054833382.1 | <i>Eublepharis macularius</i>    | 494  | 55.23   | 6.31 | -1.070 | Nucleus |
| hcSOX9  | XP_053156459.1 | <i>Hemicordylus capensis</i>     | 498  | 55.75   | 6.31 | -1.113 | Nucleus |
| acSOX9  | XP_003224717.1 | <i>Anolis carolinensis</i>       | 526  | 57.36   | 6.26 | -1.010 | Nucleus |
| pbSOX9  | XP_007429968.1 | <i>Python bivittatus</i>         | 365  | 40.77   | 6.21 | -1.140 | Nucleus |
| zvSOX9  | XP_034959970.1 | <i>Zootoca vivipara</i>          | 499  | 55.55   | 6.31 | -1.060 | Nucleus |
| cmSOX9  | XP_007056120.2 | <i>Chelonia mydas</i>            | 480  | 53.63   | 6.23 | -1.098 | Nucleus |
| psSOX9  | XP_025043574.1 | <i>Pelodiscus sinensis</i>       | 494  | 55.09   | 6.31 | -1.084 | Nucleus |
| oaSOX9  | XP_001506094.2 | <i>Ornithorhynchus anatinus</i>  | 508  | 56.42   | 6.29 | -1.107 | Nucleus |
| clSOX9  | NP_001002978.1 | <i>Canis lupus familiaris</i>    | 513  | 56.56   | 6.60 | -1.026 | Nucleus |
| hsSOX9  | NP_000337.1    | <i>Homo sapiens</i>              | 509  | 56.14   | 6.31 | -1.007 | Nucleus |
| mmSOX9  | NP_035578.3    | <i>Mus musculus</i>              | 507  | 56.08   | 6.31 | -1.021 | Nucleus |
| xtSOX9  | NP_001016853.1 | <i>Xenopus tropicalis</i>        | 482  | 53.99   | 6.29 | -1.110 | Nucleus |
| drSOX9a | NP_571718.1    | <i>Danio rerio</i>               | 462  | 51.33   | 5.98 | -0.979 | Nucleus |
| drSOX9b | NP_571719.1    | <i>Danio rerio</i>               | 400  | 44.18   | 6.60 | -0.918 | Nucleus |
| olSOX9  | NP_001098556.1 | <i>Orizias latipes</i>           | 476  | 52.68   | 6.28 | -0.963 | Nucleus |
| tgSOX9  | XP_030143168.3 | <i>Taeniopygia guttata</i>       | 474  | 52.83   | 6.14 | -1.078 | Nucleus |
| ggSOX9  | NP_989612.1    | <i>Gallus gallus</i>             | 494  | 54.85   | 6.23 | -1.078 | Nucleus |
| mgSOX9  | XP_010719808.1 | <i>Meleagris gallopavo</i>       | 451  | 49.67   | 8.38 | -1.019 | Nucleus |

**Table S2 gjSOX family members and their respective orthologs in this study.** The total of 150 SOX homologs from 7 species were utilized for phylogenetic analyses, including *G. japonicus* (*Gekko japonicus*) (16), *Z. vivipara* (*Zootoca vivipara*) (19), *X. laevis* (*Xenopus laevis*) (36), *T. scripta* (*Trachemys scripta elegans*) (18), *P. vitticeps* (*Pogona vitticeps*) (17), *M. musculus* (*Mus musculus*) (19) and *D. rerio* (*Danio rerio*) (25); Those SOX members were excluded among other 6 species, which had no orthologous relationships with any member of 16 gjSOX. HI for hydrophilicity index.

| SOX      | Family  | Accession      | Species             | Size(aa) | MW(kDa) | HI*  |
|----------|---------|----------------|---------------------|----------|---------|------|
| gjSOX2   | gjSOXB1 | XP_015262440.1 | <i>G. japonicus</i> | 384      | 40.74   | 9.92 |
| gjSOX3   | gjSOXB1 | XP_015267683.1 | <i>G. japonicus</i> | 318      | 34.01   | 9.62 |
| gjSOX4   | gjSOXC  | XP_015271872.1 | <i>G. japonicus</i> | 420      | 44.34   | 6.74 |
| gjSOX5   | gjSOXD  | XP_015268168.1 | <i>G. japonicus</i> | 764      | 84.30   | 6.12 |
| gjSOX6   | gjSOXD  | XP_015277789.1 | <i>G. japonicus</i> | 787      | 87.40   | 6.54 |
| gjSOX7   | gjSOXF  | XP_015284766.1 | <i>G. japonicus</i> | 375      | 41.46   | 6.16 |
| gjSOX8   | gjSOXE  | XP_015279835.1 | <i>G. japonicus</i> | 325      | 35.64   | 6.28 |
| gjSOX9   | gjSOXE  | WGV33816.1     | <i>G. japonicus</i> | 494      | 55.35   | 6.31 |
| gjSOX10  | gjSOXE  | XP_015261463.1 | <i>G. japonicus</i> | 461      | 49.89   | 6.2  |
| gjSOX11  | gjSOXC  | XP_015262936.1 | <i>G. japonicus</i> | 417      | 45.62   | 5.09 |
| gjSOX12  | gjSOXC  | XP_015279104.1 | <i>G. japonicus</i> | 291      | 32.88   | 8.82 |
| gjSOX13  | gjSOXD  | XP_015262805.1 | <i>G. japonicus</i> | 615      | 69.24   | 6.31 |
| gjSOX14  | gjSOXB2 | XP_015276981.1 | <i>G. japonicus</i> | 240      | 26.64   | 9.68 |
| gjSOX17  | gjSOXF  | XP_015282499.1 | <i>G. japonicus</i> | 177      | 18.63   | 5.94 |
| gjSOX18L | gjSOXF  | XP_015284209.1 | <i>G. japonicus</i> | 398      | 44.32   | 8.66 |
| gjSOX30  | gjSOXH  | XP_015272912.1 | <i>G. japonicus</i> | 778      | 85.68   | 5.75 |
| mmSOX1   | mmSOXB1 | NM_009233.3    | <i>M. musculus</i>  | 391      | 39.05   | 9.7  |
| mmSOX2   | mmSOXB1 | NM_011443.4    | <i>M. musculus</i>  | 319      | 34.41   | 9.74 |
| mmSOX3   | mmSOXB1 | NM_009237.2    | <i>M. musculus</i>  | 450      | 45.44   | 9.78 |
| mmSOX4   | mmSOXC  | NM_009238.3    | <i>M. musculus</i>  | 440      | 45.04   | 7.15 |
| mmSOX5   | mmSOXD  | XM_036165995.1 | <i>M. musculus</i>  | 715      | 79.26   | 5.92 |
| mmSOX6   | mmSOXD  | XM_030242296.2 | <i>M. musculus</i>  | 787      | 87.32   | 6.95 |
| mmSOX7   | mmSOXF  | NM_011446.1    | <i>M. musculus</i>  | 380      | 41.49   | 6.01 |
| mmSOX8   | mmSOXE  | XM_036160426.1 | <i>M. musculus</i>  | 564      | 60.53   | 6.06 |
| mmSOX9   | mmSOXE  | NM_011448.4    | <i>M. musculus</i>  | 507      | 56.08   | 6.31 |
| mmSOX10  | mmSOXE  | NM_011437.1    | <i>M. musculus</i>  | 466      | 49.95   | 6.12 |
| mmSOX11  | mmSOXC  | NM_009234.6    | <i>M. musculus</i>  | 395      | 42.63   | 4.96 |
| mmSOX12  | mmSOXC  | NM_011438.2    | <i>M. musculus</i>  | 314      | 34.08   | 5.14 |
| mmSOX13  | mmSOXD  | XM_030252397.2 | <i>M. musculus</i>  | 613      | 68.17   | 6.03 |
| mmSOX14  | mmSOXD  | NM_011440.1    | <i>M. musculus</i>  | 240      | 26.52   | 9.68 |
| mmSOX17  | mmSOXF  | NM_001289467.1 | <i>M. musculus</i>  | 419      | 44.65   | 5.85 |
| mmSOX18  | mmSOXF  | NM_009236.2    | <i>M. musculus</i>  | 377      | 40.90   | 7.6  |
| mmSOX21  | mmSOXB2 | NM_177753.3    | <i>M. musculus</i>  | 276      | 28.61   | 9.74 |
| mmSOX30  | mmSOXH  | XM_006532797.5 | <i>M. musculus</i>  | 782      | 83.94   | 8.83 |
| drSOX1a  | drSOXB1 | NP_001002483.1 | <i>D. rerio</i>     | 336      | 36.26   | 9.7  |
| drSOX1b  | drSOXB1 | NP_001032751.1 | <i>D. rerio</i>     | 340      | 36.44   | 9.7  |
| drSOX2   | drSOXB1 | NP_998283.1    | <i>D. rerio</i>     | 315      | 34.70   | 9.74 |
| drSOX3   | drSOXB1 | NP_001001811.2 | <i>D. rerio</i>     | 300      | 33.42   | 9.63 |

|          |         |                |                     |     |       |       |
|----------|---------|----------------|---------------------|-----|-------|-------|
| drSOX4a  | drSOXC  | NP_998287.1    | <i>D. rerio</i>     | 363 | 39.61 | 5.92  |
| drSOX4b  | drSOXC  | NP_957195.1    | <i>D. rerio</i>     | 342 | 36.96 | 7.77  |
| drSOX5   | drSOXC  | NP_001028757.1 | <i>D. rerio</i>     | 759 | 83.47 | 7.27  |
| drSOX6   | drSOXD  | NP_001116481.1 | <i>D. rerio</i>     | 768 | 85.79 | 6.56  |
| drSOX7   | drSOXF  | NP_001074219.1 | <i>D. rerio</i>     | 390 | 42.74 | 6.11  |
| drSOX8a  | drSOXE  | NP_001271361.1 | <i>D. rerio</i>     | 401 | 44.71 | 7.06  |
| drSOX8b  | drSOXE  | NP_001020636.1 | <i>D. rerio</i>     | 358 | 40.17 | 6.72  |
| drSOX9a  | drSOXE  | NP_571718.1    | <i>D. rerio</i>     | 462 | 51.33 | 5.98  |
| drSOX9b  | drSOXE  | NP_571719.1    | <i>D. rerio</i>     | 407 | 45.03 | 6.77  |
| drSOX10  | drSOXE  | NP_571950.1    | <i>D. rerio</i>     | 485 | 51.43 | 6.26  |
| drSOX11a | drSOXC  | NP_571411.1    | <i>D. rerio</i>     | 354 | 39.92 | 5.34  |
| drSOX11b | drSOXC  | NP_571412.1    | <i>D. rerio</i>     | 368 | 41.19 | 5.02  |
| drSOX12  | drSOXC  | NP_001025449.1 | <i>D. rerio</i>     | 355 | 39.93 | 6.09  |
| drSOX13  | drSOXD  | NP_001352418.1 | <i>D. rerio</i>     | 597 | 67.10 | 7.8   |
| drSOX14  | drSOXD  | NP_001032769.1 | <i>D. rerio</i>     | 238 | 26.55 | 9.68  |
| drSOX17  | drSOXF  | NP_571362.2    | <i>D. rerio</i>     | 413 | 45.90 | 6.92  |
| drSOX18  | drSOXF  | XP_017209261.1 | <i>D. rerio</i>     | 431 | 46.94 | 6.78  |
| drSOX19a | drSOXB1 | NP_570983.2    | <i>D. rerio</i>     | 297 | 32.78 | 9.66  |
| drSOX19b | drSOXB1 | NP_571777.1    | <i>D. rerio</i>     | 293 | 32.34 | 9.61  |
| drSOX21b | drSOXB2 | NP_001009888.1 | <i>D. rerio</i>     | 245 | 26.80 | 9.74  |
| drSOX32  | drSOXK  | NP_571926.1    | <i>D. rerio</i>     | 307 | 35.32 | 8.41  |
| tsSOX1   | tsSOXB1 | XM_034758144.1 | <i>T. scripta</i>   | 366 | 37.81 | 9.7   |
| tsSOX2   | tsSOXB1 | XR_004647093.1 | <i>T. scripta</i>   | 315 | 34.50 | 9.74  |
| tsSOX3   | tsSOXB1 | XM_034780494.1 | <i>T. scripta</i>   | 314 | 33.50 | 9.66  |
| tsSOX4   | tsSOXC  | XM_034762411.1 | <i>T. scripta</i>   | 438 | 45.15 | 6.47  |
| tsSOX5   | tsSOXC  | XM_034782427.1 | <i>T. scripta</i>   | 791 | 86.96 | 6.23  |
| tsSOX6   | tsSOXD  | XM_034770115.1 | <i>T. scripta</i>   | 834 | 92.55 | 7.03  |
| tsSOX7   | tsSOXF  | XM_034766720.1 | <i>T. scripta</i>   | 381 | 42.04 | 6.35  |
| tsSOX8   | tsSOXE  | XM_034783538.1 | <i>T. scripta</i>   | 468 | 50.94 | 6.52  |
| tsSOX9   | tsSOXE  | XM_034789829.1 | <i>T. scripta</i>   | 492 | 54.92 | 6.29  |
| tsSOX10  | tsSOXE  | XM_034776772.1 | <i>T. scripta</i>   | 463 | 49.95 | 6.2   |
| tsSOX11  | tsSOXC  | XM_034766450.1 | <i>T. scripta</i>   | 399 | 44.40 | 4.94  |
| tsSOX12  | tsSOXC  | XM_034787972.1 | <i>T. scripta</i>   | 333 | 37.46 | 7.58  |
| tsSOX13  | tsSOXD  | XM_034767283.1 | <i>T. scripta</i>   | 616 | 69.44 | 6.46  |
| tsSOX14  | tsSOXB2 | XM_034781927.1 | <i>T. scripta</i>   | 240 | 26.65 | 9.68  |
| tsSOX18  | tsSOXF  | XM_034787818.1 | <i>T. scripta</i>   | 420 | 46.60 | 6.6   |
| tsSOX21  | tsSOXB2 | XM_034758265.1 | <i>T. scripta</i>   | 276 | 28.70 | 9.74  |
| tsSOX30  | tsSOXH  | XM_034779823.1 | <i>T. scripta</i>   | 569 | 61.84 | 6.6   |
| pvSOX1   | pvSOXB1 | XP_020649967.1 | <i>P. vitticeps</i> | 160 | 17.88 | 10.34 |
| pvSOX2   | pvSOXB1 | XP_020662416.1 | <i>P. vitticeps</i> | 320 | 34.60 | 9.74  |
| pvSOX4   | pvSOXC  | XP_020637327.1 | <i>P. vitticeps</i> | 450 | 46.09 | 6.61  |
| pvSOX5   | pvSOXD  | XP_020665637.1 | <i>P. vitticeps</i> | 770 | 85.11 | 6.12  |
| pvSOX6   | pvSOXD  | XP_020658607.1 | <i>P. vitticeps</i> | 780 | 87.59 | 6.61  |
| pvSOX7   | pvSOXF  | XP_020671506.1 | <i>P. vitticeps</i> | 370 | 40.93 | 6.57  |
| pvSOX8   | pvSOXE  | XP_020661598.1 | <i>P. vitticeps</i> | 410 | 45.22 | 7.14  |
| pvSOX9   | pvSOXE  | XP_020646934.1 | <i>P. vitticeps</i> | 500 | 56.08 | 6.32  |
| pvSOX10  | pvSOXE  | XP_020643402.1 | <i>P. vitticeps</i> | 460 | 49.92 | 6.20  |
| pvSOX11  | pvSOXC  | XP_020638248.1 | <i>P. vitticeps</i> | 440 | 47.92 | 4.87  |

|           |         |                |                     |     |       |      |
|-----------|---------|----------------|---------------------|-----|-------|------|
| pvSOX12   | pvSOXC  | XP_020670327.1 | <i>P. vitticeps</i> | 320 | 36.31 | 8.25 |
| pvSOX13   | pvSOXD  | XP_020652686.1 | <i>P. vitticeps</i> | 610 | 69.53 | 6.34 |
| pvSOX14   | pvSOXB2 | XP_020643117.1 | <i>P. vitticeps</i> | 240 | 26.68 | 9.68 |
| pvSOX17   | pvSOXF  | XP_020651605.1 | <i>P. vitticeps</i> | 250 | 27.87 | 8.34 |
| pvSOX18   | pvSOXF  | XP_020670054.1 | <i>P. vitticeps</i> | 370 | 41.85 | 8.18 |
| pvSOX21   | pvSOXB2 | XP_020639150.1 | <i>P. vitticeps</i> | 189 | 21.51 | 9.83 |
| pvSOX30   | pvSOXH  | XP_020647023.1 | <i>P. vitticeps</i> | 777 | 85.17 | 6.66 |
| zvSOX1    | zvSOXB1 | XP_034971802.1 | <i>Z. vivipara</i>  | 395 | 39.76 | 9.7  |
| zvSOX2    | zvSOXB1 | XP_034988520.1 | <i>Z. vivipara</i>  | 329 | 35.71 | 9.74 |
| zvSOX3    | zvSOXB1 | XP_034981651.1 | <i>Z. vivipara</i>  | 337 | 35.66 | 9.61 |
| zvSOX4    | zvSOXC  | XP_034981245.1 | <i>Z. vivipara</i>  | 432 | 44.45 | 6.68 |
| zvSOX5    | zvSOXD  | XP_034983770.1 | <i>Z. vivipara</i>  | 809 | 89.17 | 6.88 |
| zvSOX6    | zvSOXD  | XP_034975806.1 | <i>Z. vivipara</i>  | 791 | 87.87 | 6.69 |
| zvSOX7    | zvSOXF  | XP_034966760.1 | <i>Z. vivipara</i>  | 379 | 41.63 | 6.32 |
| zvSOX8    | zvSOXE  | XP_034987881.1 | <i>Z. vivipara</i>  | 476 | 51.64 | 6.56 |
| zvSOX9    | zvSOXE  | XP_034959970.1 | <i>Z. vivipara</i>  | 504 | 56.21 | 6.32 |
| zvSOX10   | zvSOXE  | XP_034984118.1 | <i>Z. vivipara</i>  | 466 | 50.53 | 6.21 |
| zvSOX11   | zvSOXC  | XP_034965784.1 | <i>Z. vivipara</i>  | 431 | 46.75 | 5.03 |
| zvSOX12   | zvSOXC  | XP_034979381.1 | <i>Z. vivipara</i>  | 330 | 37.03 | 7.81 |
| zvSOX13   | zvSOXD  | XP_034978663.1 | <i>Z. vivipara</i>  | 620 | 69.65 | 5.96 |
| zvSOX14   | zvSOXB2 | XP_034989497.1 | <i>Z. vivipara</i>  | 245 | 27.36 | 9.68 |
| zvSOX17   | zvSOXF  | XP_034981552.1 | <i>Z. vivipara</i>  | 397 | 42.84 | 6.19 |
| zvSOX18   | zvSOXF  | XP_034977958.1 | <i>Z. vivipara</i>  | 464 | 50.46 | 6.9  |
| zvSOX21   | zvSOXB2 | XP_034972104.1 | <i>Z. vivipara</i>  | 290 | 30.29 | 9.74 |
| zvSOX30   | zvSOXH  | XP_034961649.1 | <i>Z. vivipara</i>  | 787 | 86.54 | 6.60 |
| xlSOX1.L  | xlSOXB1 | XP_018102680.1 | <i>X. laevis</i>    | 400 | 41.42 | 9.7  |
| xlSOX1.S  | xlSOXB1 | NP_001089143.1 | <i>X. laevis</i>    | 390 | 41.06 | 9.65 |
| xlSOX2.L  | xlSOXB1 | NP_001081691.1 | <i>X. laevis</i>    | 310 | 34.11 | 9.74 |
| xlSOX3.L  | xlSOXB1 | NP_001166875.1 | <i>X. laevis</i>    | 300 | 33.83 | 9.66 |
| xlSOX3.S  | xlSOXB1 | NP_001084148.1 | <i>X. laevis</i>    | 300 | 33.83 | 9.66 |
| xlSOX4.L  | xlSOXC  | NP_001079998.1 | <i>X. laevis</i>    | 380 | 41.34 | 6.38 |
| xlSOX4.S  | xlSOXC  | NP_001090179.1 | <i>X. laevis</i>    | 370 | 40.33 | 6.39 |
| xlSOX4    | xlSOXC  | NP_001165672.1 | <i>X. laevis</i>    | 370 | 40.46 | 6.57 |
| xlSOX4-1  | xlSOXC  | NP_001091911.1 | <i>X. laevis</i>    | 370 | 40.35 | 6.39 |
| xlSOX5.L  | xlSOXD  | XP_018107319.1 | <i>X. laevis</i>    | 750 | 83.97 | 6.85 |
| xlSOX5.S  | xlSOXD  | NP_001167508.1 | <i>X. laevis</i>    | 650 | 72.46 | 8.84 |
| xlSOX6.S  | xlSOXD  | NP_001267587.1 | <i>X. laevis</i>    | 760 | 84.86 | 7.26 |
| xlSOX7.L  | xlSOXF  | NP_001079337.1 | <i>X. laevis</i>    | 360 | 40.87 | 6.01 |
| xlSOX7.S  | xlSOXF  | XP_018121508.1 | <i>X. laevis</i>    | 360 | 41.12 | 6.1  |
| xlSOX8.L  | xlSOXE  | NP_001083964.1 | <i>X. laevis</i>    | 450 | 50.47 | 6.59 |
| xlSOX8.S  | xlSOXE  | XP_018094788.1 | <i>X. laevis</i>    | 460 | 50.52 | 6.59 |
| xlSOX9.L  | xlSOXE  | NP_001087942.1 | <i>X. laevis</i>    | 470 | 53.32 | 6.29 |
| xlSOX9.S  | xlSOXE  | NP_001084276.1 | <i>X. laevis</i>    | 470 | 53.38 | 6.35 |
| xlSOX10.L | xlSOXE  | NP_001082358.1 | <i>X. laevis</i>    | 440 | 49.10 | 5.63 |
| xlSOX10.S | xlSOXE  | XP_018116740.1 | <i>X. laevis</i>    | 430 | 48.21 | 6.12 |
| xlSOX11.L | xlSOXC  | NP_001135834.1 | <i>X. laevis</i>    | 380 | 42.73 | 4.87 |
| xlSOX11.S | xlSOXC  | NP_001084325.1 | <i>X. laevis</i>    | 370 | 42.09 | 4.93 |
| xlSOX12.L | xlSOXC  | XP_018090156.1 | <i>X. laevis</i>    | 250 | 28.07 | 8.62 |

|              |         |                |                  |     |       |      |
|--------------|---------|----------------|------------------|-----|-------|------|
| xlSOX12.S    | xlSOXC  | NP_001079045.1 | <i>X. laevis</i> | 240 | 27.28 | 8.46 |
| xlSOX13.S    | xlSOXD  | NP_001081238.1 | <i>X. laevis</i> | 560 | 63.41 | 6.21 |
| xlSOX14.L    | xlSOXB2 | XP_018119464.1 | <i>X. laevis</i> | 230 | 26.84 | 9.68 |
| xlSOX14.S    | xlSOXB2 | NP_001165685.1 | <i>X. laevis</i> | 230 | 26.86 | 9.68 |
| xlSOX17a.L   | xlSOXF  | NP_001081631.1 | <i>X. laevis</i> | 380 | 42.65 | 6.24 |
| xlSOX17a.S   | xlSOXF  | NP_001083136.1 | <i>X. laevis</i> | 370 | 42.52 | 6.11 |
| xlSOX17b.1.L | xlSOXF  | NP_001092185.1 | <i>X. laevis</i> | 370 | 43.12 | 5.82 |
| xlSOX17b.1.S | xlSOXF  | NP_001081633.1 | <i>X. laevis</i> | 370 | 43.26 | 5.76 |
| xlSOX18.L    | xlSOXF  | NP_001082102.1 | <i>X. laevis</i> | 360 | 40.95 | 6.87 |
| xlSOX18.S    | xlSOXF  | NP_001082104.1 | <i>X. laevis</i> | 360 | 40.58 | 6.43 |
| xlSOX21.L    | xlSOXB2 | XP_018102738.1 | <i>X. laevis</i> | 270 | 28.48 | 9.74 |
| xlSOX21.S    | xlSOXB2 | NP_001165684.1 | <i>X. laevis</i> | 260 | 28.12 | 9.68 |

|                  |                                                                                                                                                                                                       |      |
|------------------|-------------------------------------------------------------------------------------------------------------------------------------------------------------------------------------------------------|------|
| gjSOX9 cloned    | ATGAATCTCTCTCGACCCCTTTCATGAAGATGACAGAAGAGCAGGAGAAATGTCTGTCCGGCGCCCCAGCCCCACCATGTGCGGAGCACTCCGCCGGCTCGG                                                                                                | 100  |
| gjSOX9 predicted | ATGAATCTCTCTCGACCCCTTTCATGAAGATGACAGAAGAGCAGGAGAAATGTCTGTCCGGCGCCCCAGCCCCACCATGTGCGGAGCACTCCGCCGGCTCGG                                                                                                | 100  |
| Consensus        | atgaatctctctcgacccttcatgaagatgacagaagagcaggagaaatgtctgtccggcgccccagccccaccatgtcggagcactccggcgctcgc                                                                                                    |      |
| gjSOX9 cloned    | CTTGCCCTTCGGGCTCCGGATCGGACACCGAGAACACCCGACCCGAGGAAAACACCTTCCCCAAGAAGACCCGGAGTTGAAGAAGGAGAGGCACGAGGA                                                                                                   | 200  |
| gjSOX9 predicted | CTTGCCCTTCGGGCTCCGGATCGGACACCGAGAACACCCGACCCGAGGAAAACACCTTCCCCAAGAAGACCCGGAGTTGAAGAAGGAGAGGCACGAGGA                                                                                                   | 200  |
| Consensus        | cttgccttcgggctcgggatcggacaccggaacaccgcaggagaaaacaccttcccaagaacgaccggacttgaagaaggagagcgacgagga                                                                                                         |      |
| gjSOX9 cloned    | CAAGTTCCCCTGTGCATCCGCGAGGCCGTGAGCCAGGTGCTGAAGGGCTACGACTGGACGCTGGTCCCCATGCCCGTCCGGGTGAACGGCTCCAGCAAG                                                                                                   | 300  |
| gjSOX9 predicted | CAAGTTCCCCTGTGCATCCGCGAGGCCGTGAGCCAGGTGCTGAAGGGCTACGACTGGACGCTGGTCCCCATGCCCGTCCGGGTGAACGGCTCCAGCAAG                                                                                                   | 300  |
| Consensus        | caagttcccctgtgcatccgagggccgtgagccaggtgctgaagggtcagactggagcctggcgccatgccgtgagggtgaacgggtccagcaag                                                                                                       |      |
| gjSOX9 cloned    | AACAAGCCCCACGTCAAGCGGCCCATGAACGCCTTCATGGTCTGGGCGCAGCGGCCCGCAGGAAGCTGGCCGACCAGTACCCCCACCTGCACAACGCCG                                                                                                   | 400  |
| gjSOX9 predicted | AACAAGCCCCACGTCAAGCGGCCCATGAACGCCTTCATGGTCTGGGCGCAGCGGCCCGCAGGAAGCTGGCCGACCAGTACCCCCACCTGCACAACGCCG                                                                                                   | 400  |
| Consensus        | aacaagccccacgtcaagcggcccatgaagccttcatggtctggcgcgaggcgcccgaggaaagctggcgaccagtacccccacctgcacaacgccg                                                                                                     |      |
| gjSOX9 cloned    | AGCTCAGCAAGACCCTGGGCAACTCTGGAGGTTACTGAATGAGAGTGAGAAACGTCATTTGTGGAGGAGGCTGAGAGGCTTAGGGTGCAGCACAAAAA                                                                                                    | 500  |
| gjSOX9 predicted | AGCTCAGCAAGACCCTGGGCAACTCTGGAGGTTACTGAATGAGAGTGAGAAACGTCATTTGTGGAGGAGGCTGAGAGGCTTAGGGTGCAGCACAAAAA                                                                                                    | 500  |
| Consensus        | agctcagcaagaccctgggcaactctggaggttactgaatgagagtgagaaacgtccatttgtggaggaggtgagaggttaggtgcagcacaacaaa                                                                                                     |      |
| gjSOX9 cloned    | AGACCATCCCAGCTATAGTACCAGCCCCGAGAAGAAAATCAGTCAAGAATGGCAGGCTGAGCAGGAGGAAGGGTCTGAGCAAAACCCACATCTCTCCG                                                                                                    | 600  |
| gjSOX9 predicted | AGACCATCCCAGCTATAGTACCAGCCCCGAGAAGAAAATCAGTCAAGAATGGCAGGCTGAGCAGGAGGAAGGGTCTGAGCAAAACCCACATCTCTCCG                                                                                                    | 600  |
| Consensus        | agaccatcccagctataagtaccagccccggagaagaaaaatcagtcagaatgggcaggctgagcaggaggaagggctcgagcaaacccacatctctccg                                                                                                  |      |
| gjSOX9 cloned    | AACGCCATCTTCAAGGCCTTGCAGGCAGATTACCCCCAGTCTTCGTAGCATGAGTGAAGTGCACCTCCCTGGGGAGCATTCGGGCCAATCTCAAGGGC                                                                                                    | 700  |
| gjSOX9 predicted | AACGCCATCTTCAAGGCCTTGCAGGCAGATTACCCCCAGTCTTCGTAGCATGAGTGAAGTGCACCTCCCTGGGGAGCATTCGGGCCAATCTCAAGGGC                                                                                                    | 700  |
| Consensus        | aagccatcttcaaggccttcaggcgagattcaccagctcttctgtagcatgagtgaagtgcactccctggggagcatitccggccaatctcaagggtc                                                                                                    |      |
| gjSOX9 cloned    | CACCCACCCCTCCTACAACCCCTAAAACAGATGTCCAACCTGGAAGCAGGACCTGAAGCAGAGAAGGACGCCCTGCCAGAAGGAGGAGGACGCCGC                                                                                                      | 800  |
| gjSOX9 predicted | CACCCACCCCTCCTACAACCCCTAAAACAGATGTCCAACCTGGAAGCAGGACCTGAAGCAGAGAAGGACGCCCTGCCAGAAGGAGGAGGACGCCGC                                                                                                      | 800  |
| Consensus        | caccacccctcctacaacccctaaaacagatgtccaactggaagcaggacgtgaagcgagaaggacgccctgccagaaggaggagggcagccgc                                                                                                        |      |
| gjSOX9 cloned    | CCACATTGACTTCCGAGACGTGGACATTGGGGAGCTCAGCAGTGATGTCATCTCCAACATTGAGACCTTTGATGTCAATGAGTTTGACCAAGTATCTCCCA                                                                                                 | 900  |
| gjSOX9 predicted | CCACATTGACTTCCGAGACGTGGACATTGGGGAGCTCAGCAGTGATGTCATCTCCAACATTGAGACCTTTGATGTCAATGAGTTTGACCAAGTATCTCCCA                                                                                                 | 900  |
| Consensus        | ccacattgacttcgagacgtggacattggggagctcagcagtgatgcatctccaacattgagacctttagtccaatgagtttagccagattctccca                                                                                                     |      |
| gjSOX9 cloned    | CCCAATGGCCACCCAGGTGTTCAGTCACCCATGGCCAACCTTGCCCAAGTCACCTATCTGGCAGCTATGGAATCAGCAGCACAACAGCCACGCCAGCAG                                                                                                   | 1000 |
| gjSOX9 predicted | CCCAATGGCCACCCAGGTGTTCAGTCACCCATGGCCAACCTTGCCCAAGTCACCTATCTGGCAGCTATGGAATCAGCAGCACAACAGCCACGCCAGCAG                                                                                                   | 1000 |
| Consensus        | cccaatggccaccagggtgttcagtcacccatggccaactggccaagtcacttatactggcagctatggaatcagcagcacaacagccacggccagcag                                                                                                   |      |
| gjSOX9 cloned    | GTACTGGTCACGTCTGGATGTCTAAGCAACAACCCACCTCTCAGCAGCCACCGTCCCAAGCTCAGCAGCAAGCATCACAGCAACAGCAGCATACACTAAC                                                                                                  | 1100 |
| gjSOX9 predicted | GTACTGGTCACGTCTGGATGTCTAAGCAACAACCCACCTCTCAGCAGCCACCGTCCCAAGCTCAGCAGCAAGCATCACAGCAACAGCAGCATACACTAAC                                                                                                  | 1100 |
| Consensus        | gtactggtcacgtctggatgtctaaagcaacaacccactctcagcagccaccgtcccaagctcagcagcaagcatcacagcaacagcagcatacactaac                                                                                                  |      |
| gjSOX9 cloned    | CACCCTGAGTAGTGAACAGGGGCAACCTCAGCAGAGGACACACATCAAACTGAGCAGCTCAGTCCCAGCCATTACACTGAGCAGCAGCAGCATTTCTCT                                                                                                   | 1200 |
| gjSOX9 predicted | CACCCTGAGTAGTGAACAGGGGCAACCTCAGCAGAGGACACACATCAAACTGAGCAGCTCAGTCCCAGCCATTACACTGAGCAGCAGCAGCATTTCTCT                                                                                                   | 1200 |
| Consensus        | caccctgagtagtgaacaggggcaacctcagcagaggacacacatcaaaactgagcagctcagtcaggccattacactgagcagcagcagcatctctct                                                                                                   |      |
| gjSOX9 cloned    | CAGCAGATCAGCTACACTTCTTCAACCTCAGCAGCTACAGTTCTCTCTACCCAATATCACTCGTTCCCAATATGACTACACAGACACCAGAACTCCA                                                                                                     | 1300 |
| gjSOX9 predicted | CAGCAGATCAGCTACACTTCTTCAACCTCAGCAGCTACAGTTCTCTCTACCCAATATCACTCGTTCCCAATATGACTACACAGACACCAGAACTCCA                                                                                                     | 1300 |
| Consensus        | cagcagatcagctacacttcttcaacctcagcagctacagttctctcctacccaactatactctgttccagctatgactacacagaccacagaactcca                                                                                                   |      |
| gjSOX9 cloned    | ACTCCTACTACAGCCATGCAGCCAGGCCAGAGTTCAGTCTCTATTCAACATTCACTACATGAACCCCAACCCAGAGGCCAATGTACACACCGATTGCAG                                                                                                   | 1400 |
| gjSOX9 predicted | ACTCCTACTACAGCCATGCAGCCAGGCCAGAGTTCAGTCTCTATTCAACATTCACTACATGAACCCCAACCCAGAGGCCAATGTACACACCGATTGCAG                                                                                                   | 1400 |
| Consensus        | actcctactacagccatgcagccagccaggttcaggtctctattcaacttcaactacatgaaccccaacccagagggcattgcacacccgattgcag                                                                                                     |      |
| gjSOX9 cloned    | TACTACAGGGGTGCCTTCCATTCTCAGACCCACAGCCCAACAACACTGGGAACAGCCTGTCTACACACAACCTACAAGGCCATA                                                                                                                  | 1484 |
| gjSOX9 predicted | TACTACAGGGGTGCCTTCCATTCTCAGACCCACAGCCCAACAACACTGGGAACAGCCTGTCTACACACAACCTACAAGGCCATA                                                                                                                  | 1484 |
| Consensus        | tactacaggggtgccttccattctcagaccacagcccaacaactgggaacagcctgtctacacacaactcacaaggccata                                                                                                                     |      |
| gjSOX9 cloned    | MNL LDF MKMT EEQE KCLS GAPSP TMS DDS AGS P C P S GS GS DT ENT RP QENT F P KNDP DL K KES DEDKF P VCI RE AVS QVL KG YDW L V P MP VR VNGS S K                                                            | 100  |
| gjSOX9 predicted | MNL LDF MKMT EEQE KCLS GAPSP TMS DDS AGS P C P S GS GS DT ENT RP QENT F P KNDP DL K KES DEDKF P VCI RE AVS QVL KG YDW L V P MP VR VNGS S K                                                            | 100  |
| Consensus        | mnll d p f m k m t e e q e k c l s g a p s p t m s d d s a g s p c p s g s g s d t e n t r p q e n t f p k n d p d l k k e s d e d k f p v c i r e a v s q v l k g y d w l v p m p v r v n g s s k    |      |
| gjSOX9 cloned    | NKP HVKRP VNAF MVWAQAARRKL ADQYP HLHNAELSK T L GKL WRL N L N E S E K R P F V E E A E R L R V Q H K K D H P D Y K Y Q P R R R K S V K N Q A Q E Q E G S E Q T H I S P                                  | 200  |
| gjSOX9 predicted | NKP HVKRP VNAF MVWAQAARRKL ADQYP HLHNAELSK T L GKL WRL N L N E S E K R P F V E E A E R L R V Q H K K D H P D Y K Y Q P R R R K S V K N Q A Q E Q E G S E Q T H I S P                                  | 200  |
| Consensus        | n k p h v k r p m m a f m v w a q a a r r k l a d q y p h l h n a e l s k t l g k l w r l n l n e s e k r p f v e e a e r l r v q h k k d h p d y k y q p r r r k s v k n q a q e e g s e q t h i s p |      |
| gjSOX9 cloned    | NAI F KAL QADS PQSSSSMS E VHS P GEHS GQS QGPP T P P T P P K T D V Q P G K Q D L K R E G R P L P E G G R Q P P H I D F R D V D I G E L S S D V I S N I E T F D V N E F D Q Y L P                       | 300  |
| gjSOX9 predicted | NAI F KAL QADS PQSSSSMS E VHS P GEHS GQS QGPP T P P T P P K T D V Q P G K Q D L K R E G R P L P E G G R Q P P H I D F R D V D I G E L S S D V I S N I E T F D V N E F D Q Y L P                       | 300  |
| Consensus        | n a i f k a l q a d s p q s s s s m s e v h s p g e h s g q s q g p p t p p t p k t d v q p g k q d l k r e g r p l p e g g r q p p h i d f r d v d i g e l s s d v i s n i e t f d v n e f d q y l p |      |
| gjSOX9 cloned    | PNGHP GVP VT HGQP GQVT YT GS YGI S S T T A T P A G T G H V W M S K Q Q P S Q Q P S Q A Q Q A S Q Q Q O H T L T L S S E Q G Q P Q O R T H I K T E Q L S P S H Y T E Q Q Q H S P                        | 400  |
| gjSOX9 predicted | PNGHP GVP VT HGQP GQVT YT GS YGI S S T T A T P A G T G H V W M S K Q Q P S Q Q P S Q A Q Q A S Q Q Q O H T L T L S S E Q G Q P Q O R T H I K T E Q L S P S H Y T E Q Q Q H S P                        | 400  |
| Consensus        | p n g h p g v p v t h g q p g v t y t g s y g i s s t t a t p a g t g h v w m s k q q p s q q p s q a q q a s q q q o h t l t l s s e q g q p q r t h i k t e q l s p s h y t e q q q h s p           |      |
| gjSOX9 cloned    | QQI S Y T S F N L Q H Y S S S Y P T I T R S Q Y D Y T D H Q N S N S Y S H A A S Q S S S L Y S T F T Y M N P T Q R P M Y T P I A G T T G V P S I P Q T H S P Q H W E Q P V Y T Q L T R                 | 493  |
| gjSOX9 predicted | QQI S Y T S F N L Q H Y S S S Y P T I T R S Q Y D Y T D H Q N S N S Y S H A A S Q S S S L Y S T F T Y M N P T Q R P M Y T P I A G T T G V P S I P Q T H S P Q H W E Q P V Y T Q L T R                 | 493  |
| Consensus        | q q i s y t s f n l q h y s s s y p t i t r s q y d y t d h q n s n s y s h a a s q s s s l y s t f t y m n p t q r p m y t p i a t t g v p s i p q t h s p q h w e q p v y t q l t r                 |      |

**Figure S1** Sequence alignment of gjSOX9. The upper for nucleotides sequence alignment of gjSOX encoding region between cloned cDNA (OQ935362) in this study and annotation sequence from *G. japonicus* genome (XM\_015422341), and the lower for amino acids sequence alignment between deduced amino acids sequence from cloned cDNA in this study (WGV33816.1) and from *G. japonicus* genome (XP\_015277827.1). Sequence alignment was performed by DNAMAN9.0. The red “letter” means different nucleotide or amino acid residue.

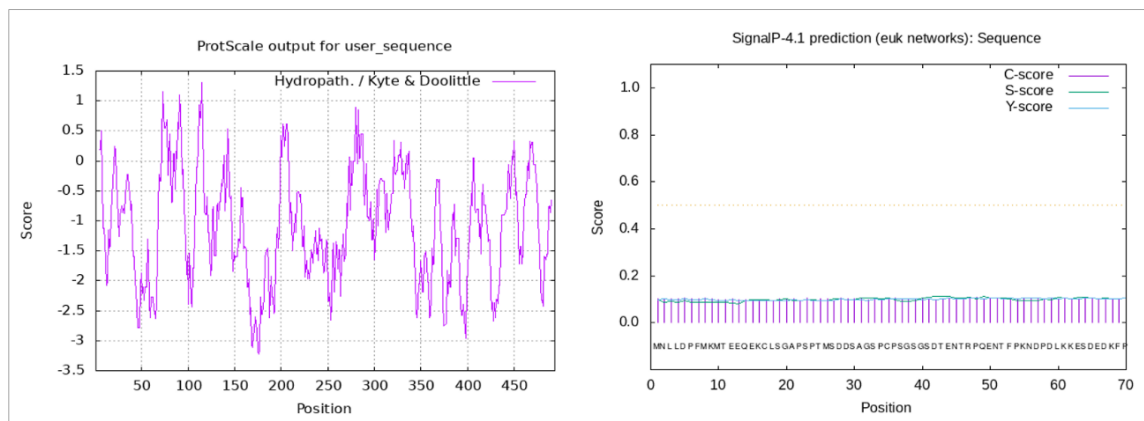

**Figure S2** Hydrophilic analysis (left) and signal peptide prediction (right) of gjSOX9. Hydrophilic analysis was performed by online software protScale and signal peptide was predicted using online software SingalP4.1.

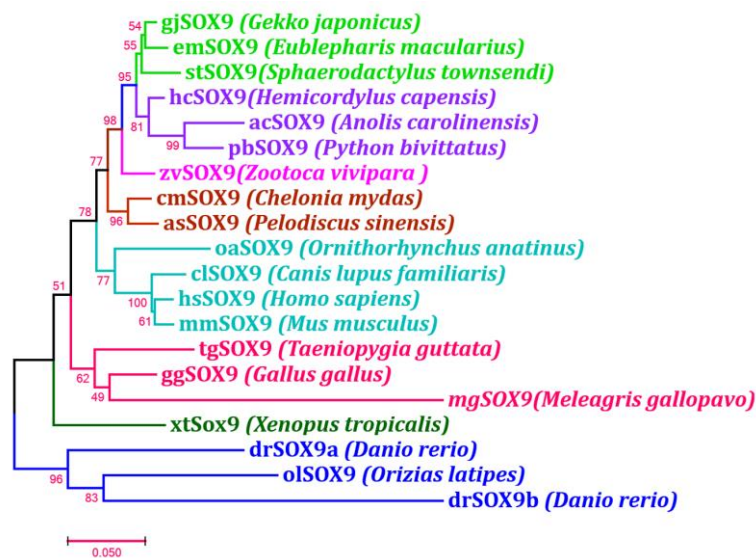

**Figure S3** Phylogenetic analyses of gjSOX9 with its homologies. The phylogenetic tree was reconstructed using MEGA11.0 software by neighbor-joining method with 1000 bootstrap replicates based on amino acid sequence alignment. Sequence information of gjSOX9 and its orthologs were the same as those in Table S1



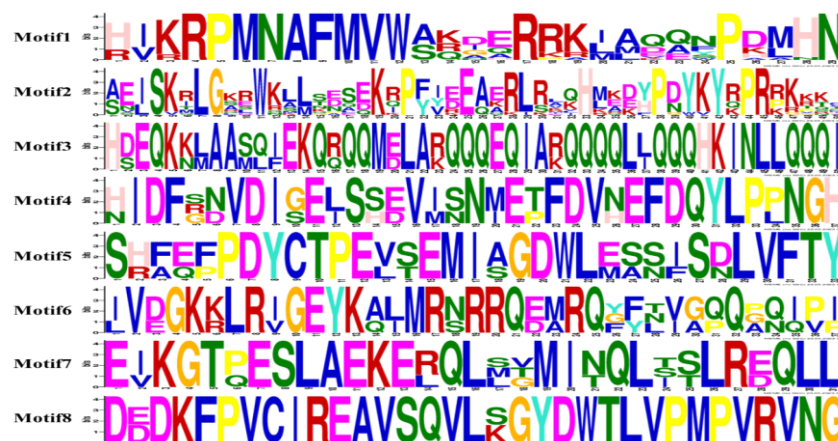

**Figure S4** Sequence conservation analyses of Motif 1-8 among 16 gjSOX members. Motifs sequence conservation were analyzed by online MEME software. A sequence logo consists of a stack of letters at each position. The relative sizes of the letters indicate their frequency in the sequences.

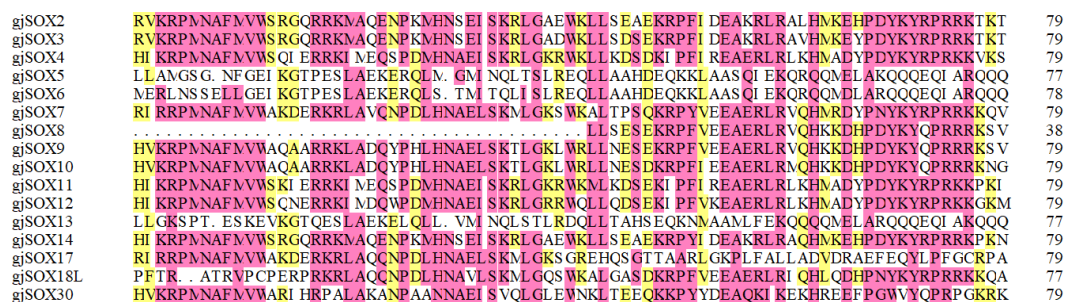

**Figure S5** Multiple sequence alignment of HMGs for 16 gjSOX members. Alignment analysis was performed by DNAMAN9.0. The red “letter” means the sequence identity ≥ 75% while yellow “letter” means sequence identity ≥ 50%.
